# Supplementary material for: Probing the absence of third phase formation during the extraction of trivalent metal ions in an ionic liquid medium
Source: Royal Society of Chemistry journal article supplement (doi:10.1039/c8nj06267f), 2019-01-01
Supplement: c8nj06267f1.pdf [file c8nj06267f1.pdf]

## **Probing the absence of third phase formation during the extraction of trivalent metal ions in ionic liquid medium**

**Ch. Venkateswara Rao<sup>1,2</sup>, Alok Rout<sup>2</sup>, K. A. Venkatesan<sup>2\*</sup>**

<sup>1</sup>Homi Bhabha National Institute, Training School Complex, Anushakti Nagar,  
Mumbai, 400094, India

<sup>2</sup>Fuel Chemistry Division, Indira Gandhi Centre for Atomic Research,  
Kalpakkam, 603102

### ***Measurement of Viscosity and Refractive index***

Viscosities of ionic liquid phases were measured using Lovis 2000 ME; a rolling ball viscometer (supplied by Anton Paar), which measures the rolling time of a ball through transparent and opaque liquids according to Höppler's principle. The uncertainty in the values of viscosity was about  $2 \times 10^{-3}$  mPa.s. Similarly, the refractive index of the organic phase sample was measured using a Anton Parr refractometer (Model: Abbemat 200) which can measure the refractive index in the temperature range of 283K to 333K with an accuracy of  $\pm 0.0001$  nD.

**Table S1.** Viscosity and refractive index of ionic liquid phases measured after equilibration with nitric acid.

| <b>[HNO<sub>3</sub>]/ M</b> | <b>Viscosity/ mPa.s</b>                   |                                                        |                                                     |
|-----------------------------|-------------------------------------------|--------------------------------------------------------|-----------------------------------------------------|
|                             | <b>[N<sub>1888</sub>][NO<sub>3</sub>]</b> | <b>0.1M T2EHDGA/[N<sub>1888</sub>][NO<sub>3</sub>]</b> | <b>0.1M CMPO/[N<sub>1888</sub>][NO<sub>3</sub>]</b> |
| 0.5                         | 128                                       | 141                                                    | 131                                                 |
| 1                           | 118                                       | 123                                                    | 120                                                 |
| 3                           | 104                                       | 111                                                    | 108                                                 |
| 5                           | 90                                        | 98                                                     | 94                                                  |
| 8                           | 71                                        | 75                                                     | 72                                                  |

  

| <b>[HNO<sub>3</sub>]/ M</b> | <b>Refractive Index</b>                   |                                                        |                                                     |
|-----------------------------|-------------------------------------------|--------------------------------------------------------|-----------------------------------------------------|
|                             | <b>[N<sub>1888</sub>][NO<sub>3</sub>]</b> | <b>0.1M T2EHDGA/[N<sub>1888</sub>][NO<sub>3</sub>]</b> | <b>0.1M CMPO/[N<sub>1888</sub>][NO<sub>3</sub>]</b> |
| 0.5                         | 1.4642                                    | 1.4646                                                 | 1.4667                                              |
| 1                           | 1.4621                                    | 1.4622                                                 | 1.4622                                              |
| 3                           | 1.4588                                    | 1.4591                                                 | 1.4589                                              |
| 5                           | 1.4577                                    | 1.4579                                                 | 1.4583                                              |
| 8                           | 1.4574                                    | 1.4576                                                 | 1.4578                                              |

**Table S2.** Viscosity and refractive index of different ionic liquid phases after Nd(III) loading from 3 M nitric acid.

| <b>[Nd(III)]<sub>aq. ,ini</sub>/ M</b> | <b>Viscosity/ mPa.s</b>                                |                                                     |
|----------------------------------------|--------------------------------------------------------|-----------------------------------------------------|
|                                        | <b>0.1M T2EHDGA/[N<sub>1888</sub>][NO<sub>3</sub>]</b> | <b>0.1M CMPO/[N<sub>1888</sub>][NO<sub>3</sub>]</b> |
| 0                                      | 111                                                    | 108                                                 |
| 0.5                                    | 125                                                    | 115                                                 |
| 1                                      | 128                                                    | 118                                                 |
| 3                                      | 135                                                    | 127                                                 |
| 5                                      | 138                                                    | 134                                                 |

  

| <b>[Nd(III)]<sub>aq. ,ini</sub>/ M</b> | <b>Refractive Index</b>                                |                                                     |
|----------------------------------------|--------------------------------------------------------|-----------------------------------------------------|
|                                        | <b>0.1M T2EHDGA/[N<sub>1888</sub>][NO<sub>3</sub>]</b> | <b>0.1M CMPO/[N<sub>1888</sub>][NO<sub>3</sub>]</b> |
| 0                                      | 1.4591                                                 | 1.4589                                              |
| 0.5                                    | 1.4582                                                 | 1.4591                                              |
| 1                                      | 1.4583                                                 | 1.4594                                              |
| 3                                      | 1.4585                                                 | 1.4598                                              |
| 5                                      | 1.4588                                                 | 1.4599                                              |

**Table S3.** Viscosity and refractive index of ionic liquid phase at different concentrations of T2EHDGA (or CMPO).

| <b>[Extractant]/ M<br/>in [N<sub>1888</sub>][NO<sub>3</sub>]</b> | <b>Viscosity/ mPa.s</b>                           |                                                |
|------------------------------------------------------------------|---------------------------------------------------|------------------------------------------------|
|                                                                  | <b>T2EHDGA/[N<sub>1888</sub>][NO<sub>3</sub>]</b> | <b>CMPO/[N<sub>1888</sub>][NO<sub>3</sub>]</b> |
| 0                                                                | 104                                               | 104                                            |
| 0.1                                                              | 111                                               | 108                                            |
| 0.2                                                              | 113                                               | 114                                            |
| 0.3                                                              | 125                                               | 123                                            |

  

| <b>[Extractant]/ M<br/>in [N<sub>1888</sub>][NO<sub>3</sub>]</b> | <b>Refractive Index</b>                           |                                                |
|------------------------------------------------------------------|---------------------------------------------------|------------------------------------------------|
|                                                                  | <b>T2EHDGA/[N<sub>1888</sub>][NO<sub>3</sub>]</b> | <b>CMPO/[N<sub>1888</sub>][NO<sub>3</sub>]</b> |
| 0                                                                | 1.4588                                            | 1.4588                                         |
| 0.1                                                              | 1.4591                                            | 1.4589                                         |
| 0.2                                                              | 1.4592                                            | 1.4602                                         |
| 0.3                                                              | 1.4594                                            | 1.4630                                         |

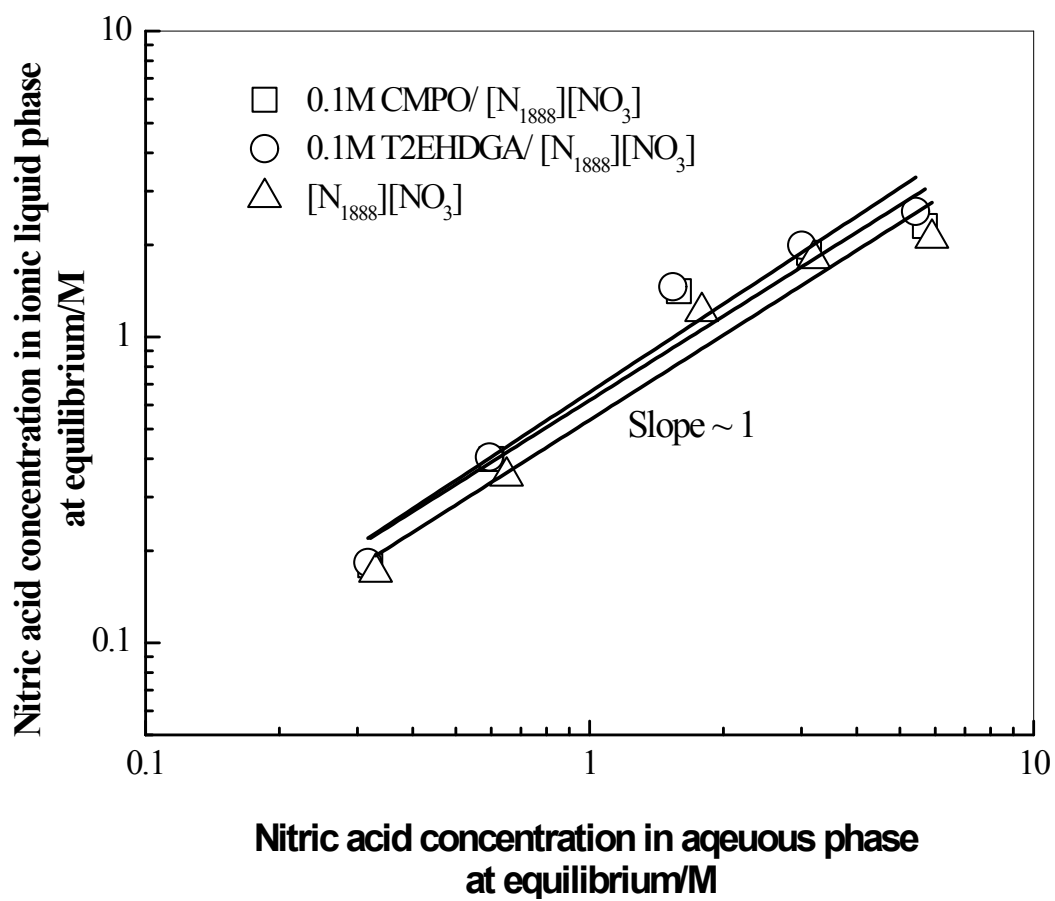

**Figure S1.** Nitric acid extraction isotherm in various ionic liquid systems.

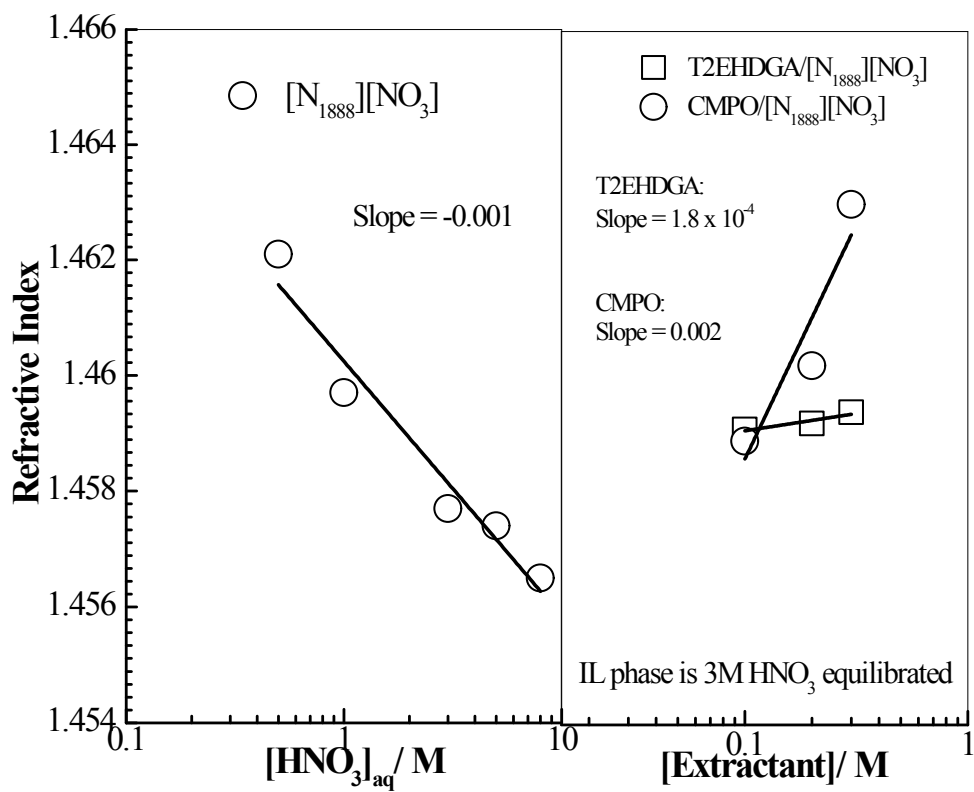

**Figure S2.** Variation of refractive indices of the ionic liquid phase  $[N_{1888}][NO_3]$  as a function of nitric acid and extractants.
